# Supplementary material
Source: PubMed Central journal article supplement (PMC4475507)

**Bayesian models trained with HTS data for predicting  
 $\beta$ -haematin inhibition and *in vitro* antimalarial activity**

Kathryn J. Wicht<sup>a</sup>, Jill M. Combrinck<sup>a,b</sup>, Peter J. Smith<sup>b</sup> and Timothy J. Egan<sup>a,\*</sup>

<sup>a</sup>Department of Chemistry, University of Cape Town, Rondebosch 7701, South Africa

<sup>b</sup>Division of Pharmacology, Department of Medicine, Faculty of Health Sciences, University of Cape Town, Observatory 7925, South Africa

**SUPPLEMENTARY DATA**

Table S1: Cross-validation result of the Bayesian models for predicting  $\beta$ H inhibition and whole-cell parasite activity.

| Cross-Validation Result                  |                           |            |                            |                             |                             |                            |                          |                          |                          |
|------------------------------------------|---------------------------|------------|----------------------------|-----------------------------|-----------------------------|----------------------------|--------------------------|--------------------------|--------------------------|
| Model Name                               | ROC Score (leave-one-out) | ROC Rating | True Positive <sup>a</sup> | False Negative <sup>a</sup> | False Positive <sup>a</sup> | True Negative <sup>a</sup> | Sensitivity <sup>a</sup> | Specificity <sup>a</sup> | Concordance <sup>a</sup> |
| $\beta$ H inhib. (cut-off = 100 $\mu$ M) | 0.915                     | Excellent  | 1944                       | 169                         | 8531                        | 55586                      | 0.920                    | 0.867                    | 0.869                    |
| Whole-cell (cut-off = 2 $\mu$ M)         | 0.992                     | Excellent  | 804                        | 13                          | 1394                        | 40334                      | 0.984                    | 0.967                    | 0.967                    |

<sup>a</sup> 5-fold cross-validation

Figure S1 (a) 5-Fold cross-validation ROC curve for  $\beta$ H inhibition activity (best Bayesian probability score cut-off = -4.920) and (b) whole-cell parasite activity (best Bayesian probability score cut-off = -8.580).

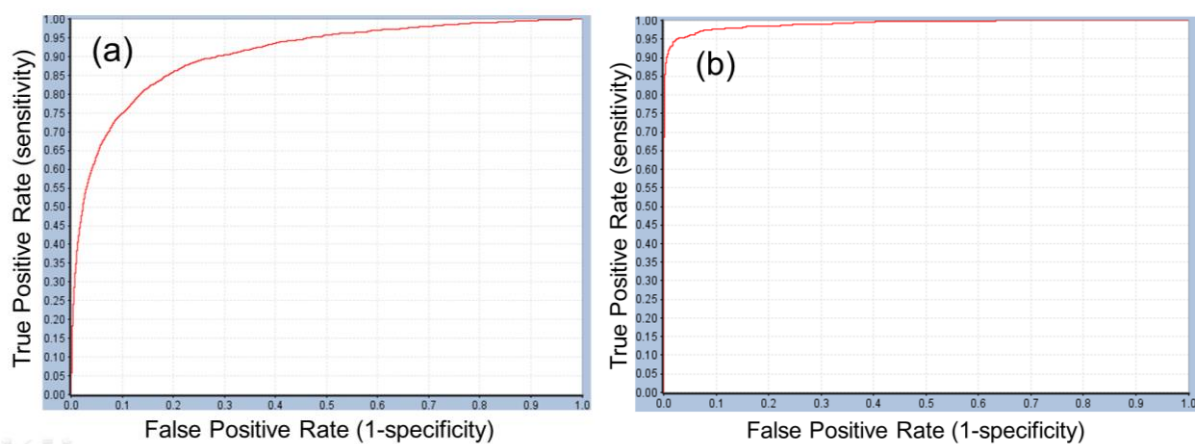

Figure S2 (a) Good and bad fingerprints for  $\beta$ H model (cut-off of 100  $\mu$ M)Good features from ECFP<sub>6</sub>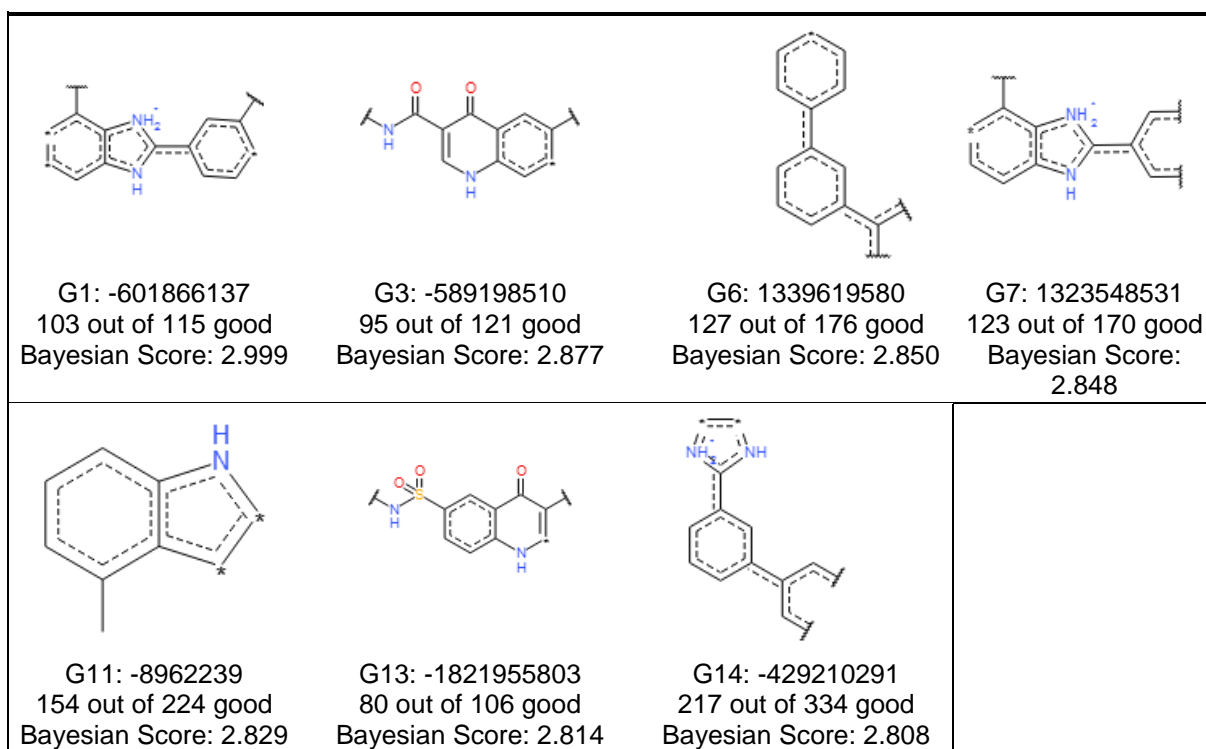Bad features from ECFP<sub>6</sub>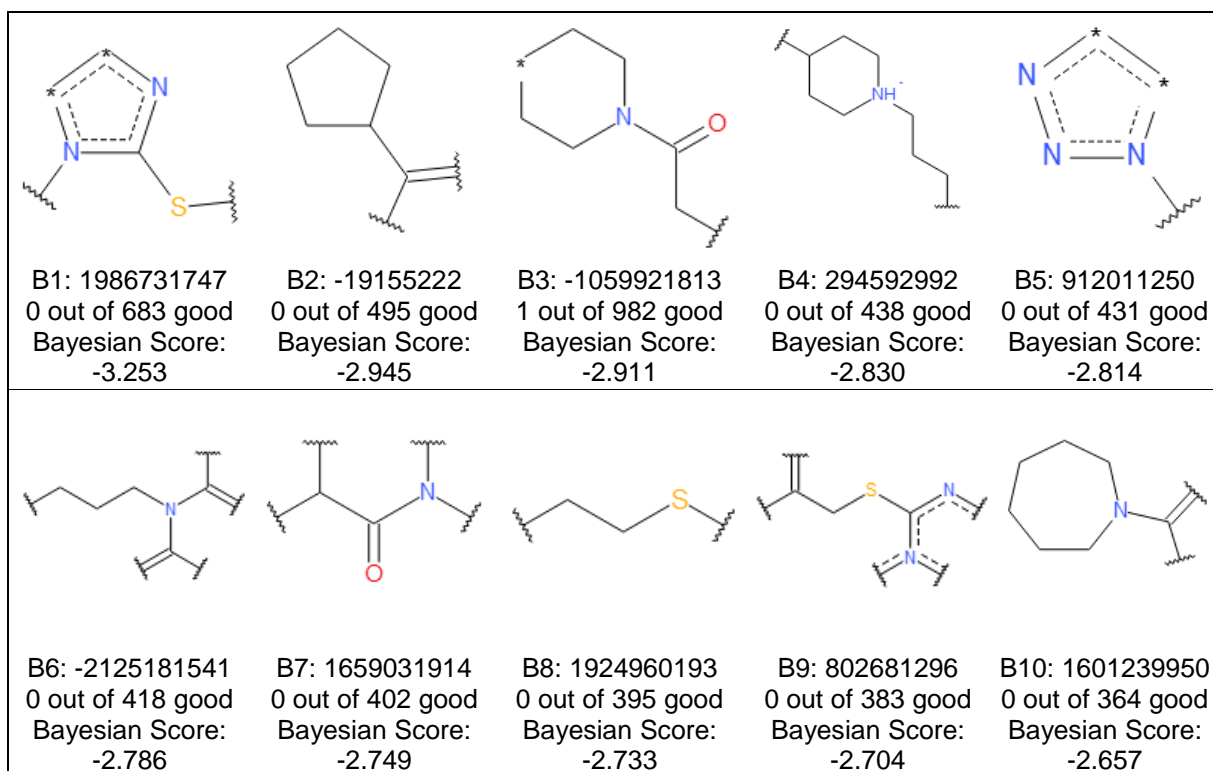

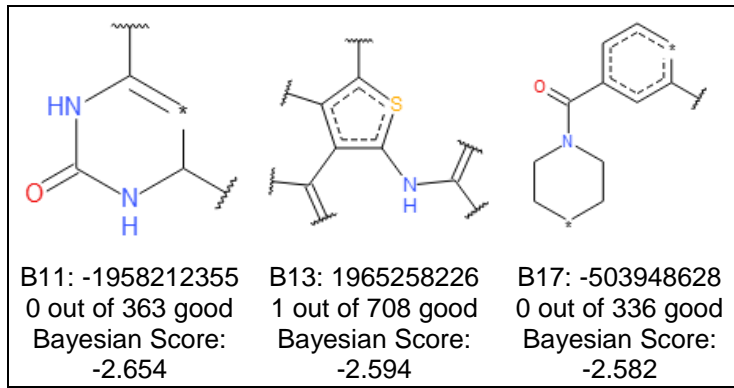

Figure S2 (b) Good and bad fingerprints for parasite activity model (cut-off of 2  $\mu$ M)

### Good Features from ECFP<sub>6</sub>

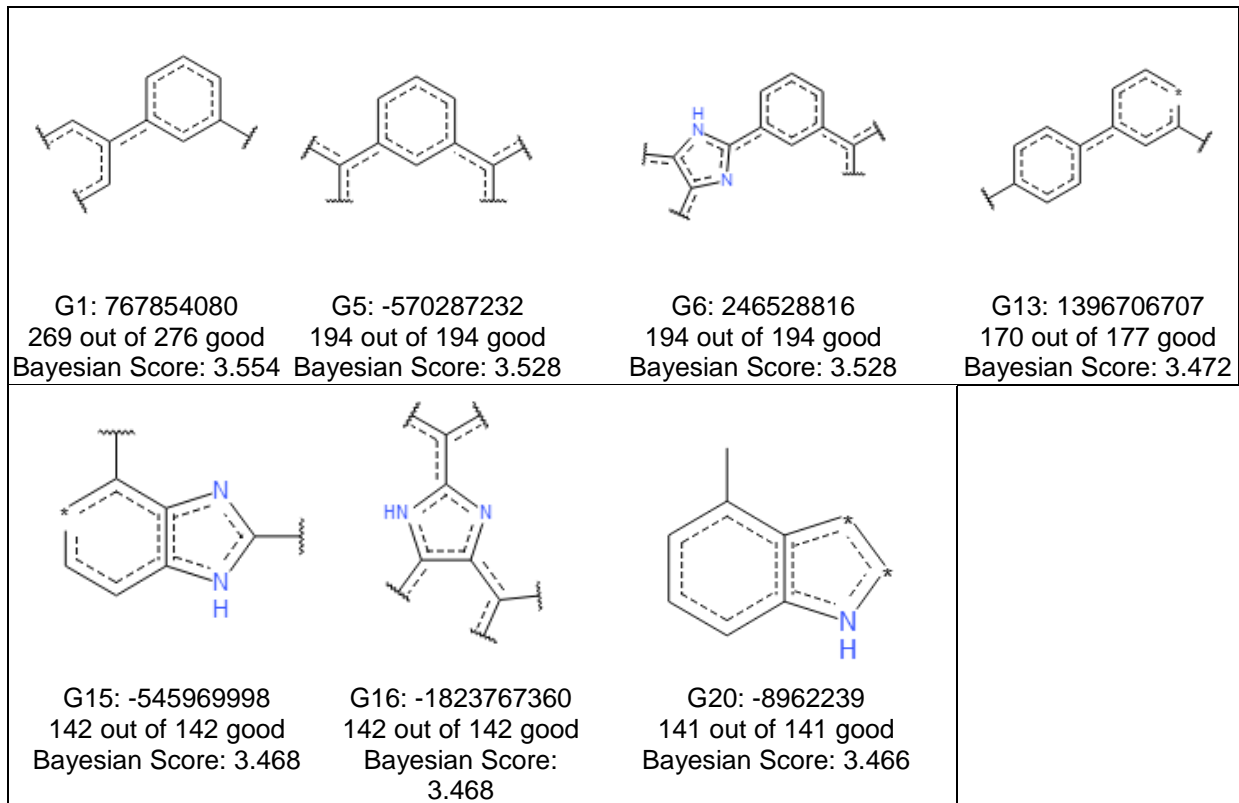

Bad features from ECFP<sub>6</sub>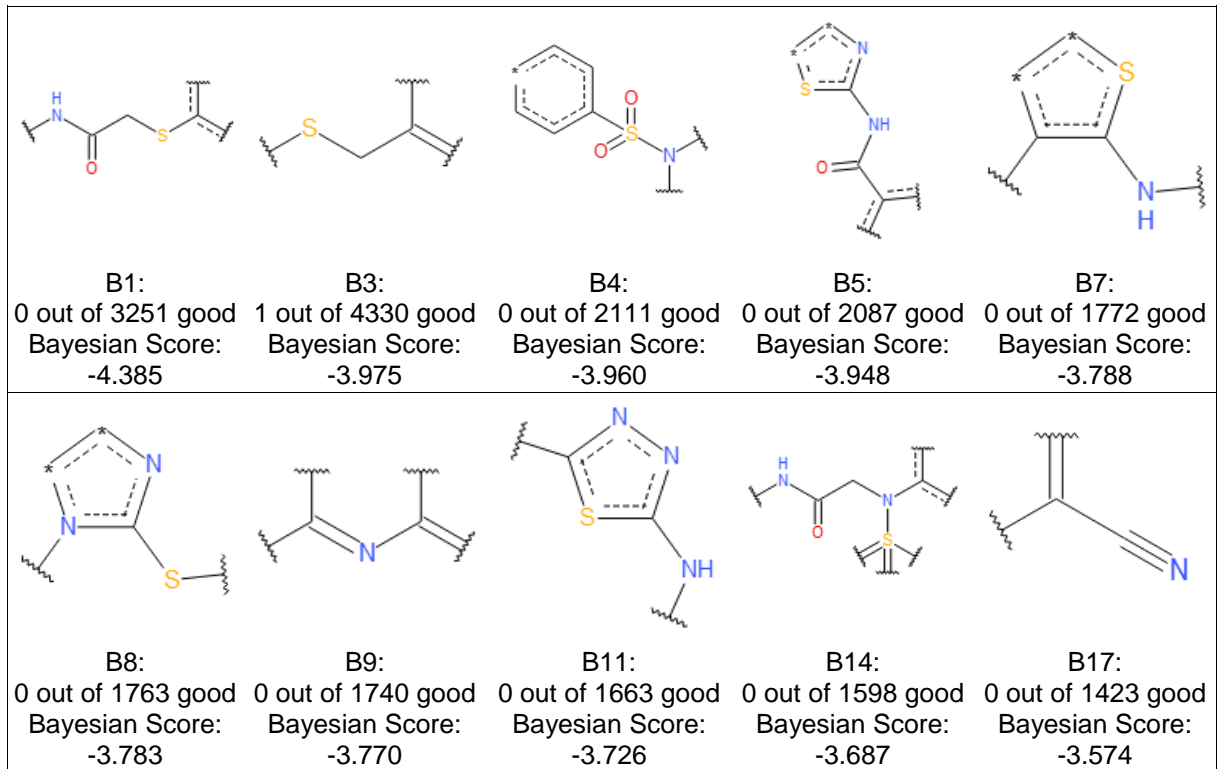

Table S2: Coefficients for PCA of TCAMS compounds. The largest coefficient (absolute value) of each specific feature is given in bold, indicating the component to which it makes the largest contribution.

| <b>(a) PCA for TCAMS compounds</b>                          |                      |                      |                      |
|-------------------------------------------------------------|----------------------|----------------------|----------------------|
| <b>Equation Terms</b>                                       | <b>GSK_PC1</b>       | <b>GSK_PC2</b>       | <b>GSK_PC3</b>       |
| Constant                                                    | -7.535               | -2.173               | -1.67                |
| ALogP                                                       | -0.0297              | <b>0.3191</b>        | -0.07758             |
| Molecular_Weight                                            | <b>0.004961</b>      | 0.001587             | -0.002147            |
| Num_H_Donors                                                | <b>0.3419</b>        | -0.2197              | 0.1379               |
| Num_H_Acceptors                                             | <b>0.2155</b>        | -0.1538              | -0.04567             |
| Num_RotatableBonds                                          | 0.1401               | 0.00571              | <b>-0.1751</b>       |
| Num_Rings                                                   | 0.2899               | <b>0.3646</b>        | 0.3234               |
| Num_AromaticRings                                           | 0.2157               | <b>0.2792</b>        | 0.438                |
| Molecular_FractionalPolarSurfaceArea                        | 1.717                | <b>-6.678</b>        | 6.176                |
| <b>(b) PCA for TCAMS, VU and OU compounds</b>               |                      |                      |                      |
| <b>Equation Terms</b>                                       | <b>GSK_VU_OU PC1</b> | <b>GSK_VU_OU PC2</b> | <b>GSK_VU_OU PC3</b> |
| Constant                                                    | -6.926               | 1.34                 | -2.264               |
| ALogP                                                       | 0.1477               | <b>0.325</b>         | -0.05444             |
| Molecular_Weight                                            | <b>0.004804</b>      | -0.001017            | -0.001884            |
| Num_H_Donors                                                | 0.2157               | <b>-0.2864</b>       | 0.2792               |
| Num_H_Acceptors                                             | 0.1471               | <b>-0.2593</b>       | -0.06759             |
| Num_RotatableBonds                                          | 0.146                | -0.06714             | <b>-0.1623</b>       |
| Num_Rings                                                   | <b>0.3852</b>        | 0.1654               | 0.3146               |
| Num_AromaticRings                                           | <b>0.3179</b>        | 0.1867               | 0.4487               |
| Molecular_FractionalPolarSurfaceArea                        | -1.953               | <b>-6.19</b>         | 5.602                |
| <b>(c) PCA for TCAMS, VU, OU, FDA and Aldrich compounds</b> |                      |                      |                      |
| <b>Equation Terms</b>                                       | <b>PCA_PC1</b>       | <b>PCA_PC2</b>       | <b>PCA_PC3</b>       |
| Constant                                                    | -4.299               | -2.03                | 0.7441               |
| ALogP                                                       | 0.1367               | <b>-0.1948</b>       | 0.02947              |
| Molecular_Weight                                            | <b>0.003753</b>      | 0.001072             | 0.0009481            |
| Num_H_Donors                                                | 0.144                | <b>0.2699</b>        | -0.1638              |
| Num_H_Acceptors                                             | 0.09671              | <b>0.2059</b>        | 0.03007              |
| Num_RotatableBonds                                          | 0.1043               | 0.06799              | <b>0.2143</b>        |
| Num_Rings                                                   | <b>0.2972</b>        | -0.07645             | -0.236               |
| Num_AromaticRings                                           | <b>0.2733</b>        | -0.121               | -0.2679              |
| Molecular_FractionalPolarSurfaceArea                        | -1.398               | <b>3.891</b>         | -3.011               |

*Figure S3*: Population graphs of Bayesian scores for Library A ( $\beta$ H hits with >60% inhibition at 19  $\mu$ M) and Library B ( $\beta$ H non-hits with <40% inhibition). Bayesian models LibA and LibB were created using samples in Library A and samples in Library B respectively. A score was computed for all samples in both libraries using (a) LibA and (b) LibB models respectively. The Bayesian distance was calculated as  $Score_{AA} + Score_{BB} - Score_{AB} - Score_{BA}$ , where  $Score_{AA}$  = average LibA score for the molecules in Library A,  $Score_{BB}$  = average LibB score for the molecules in Library B,  $Score_{AB}$  = average LibB score for the molecules in Library A,  $Score_{BA}$  = average LibA score for the molecules in Library B. The larger the distance, the more dissimilar the libraries. The Bayesian distance for  $\beta$ H hits vs non-hits was 72.3, indicating a large difference in the data sets.

(a)

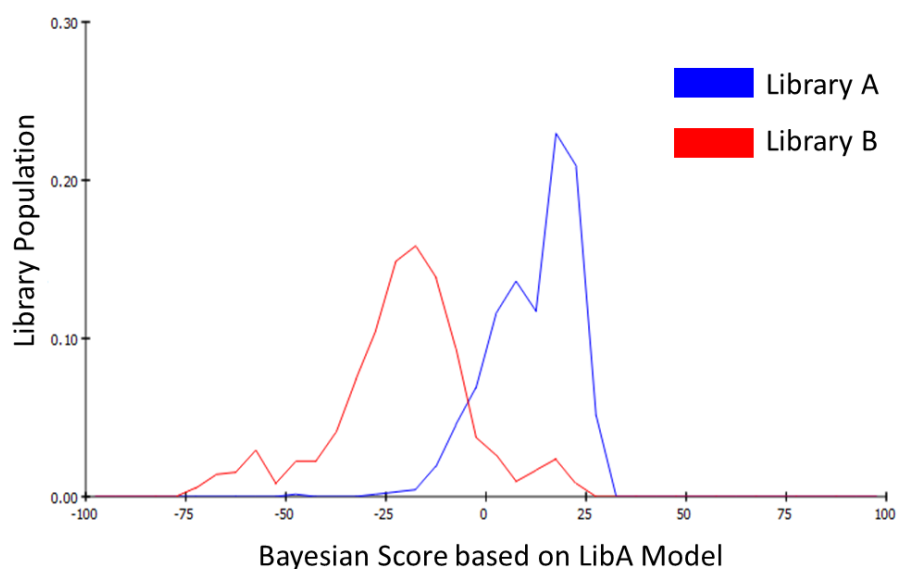

(b)

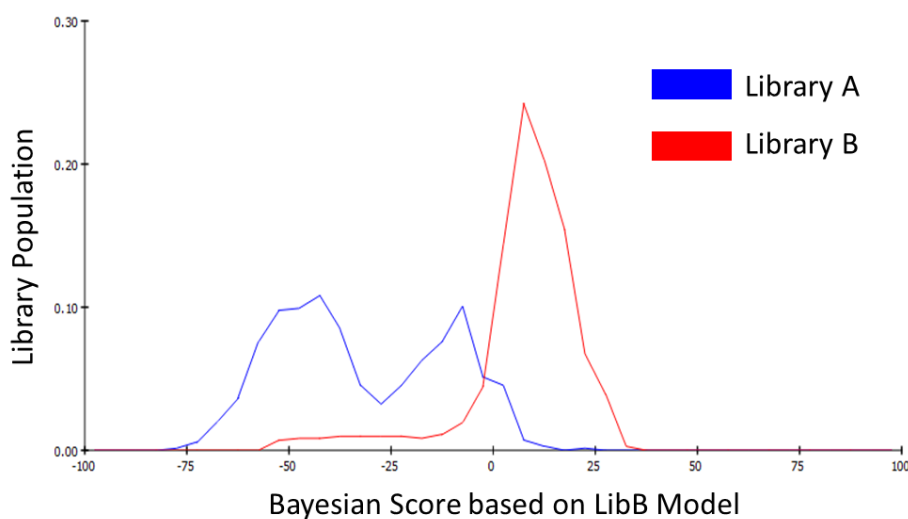

Table S3: FDA Approved compounds ordered by parasite activity Bayesian prediction score (2  $\mu$ M model). The top 2.1% of compounds showing the known  $\beta$ H inhibiting antimalarials (bold), a list of non- $\beta$ H antimalarials with their scores and the bottom 2.1%.

| Rank #                 | Generic name          | Parasite activity Bayesian prediction score | $\beta$ H activity Bayesian prediction score | Antimalarial activity indication from PubChem |
|------------------------|-----------------------|---------------------------------------------|----------------------------------------------|-----------------------------------------------|
| <b>Top ranked 2.1%</b> |                       |                                             |                                              |                                               |
| 1                      | Lapatinib             | 121.907                                     | 81.4034                                      | Active                                        |
| <b>2</b>               | <b>Amodiaquine</b>    | <b>55.9673</b>                              | <b>4.97018</b>                               | <b>Clinical Antimalarial</b>                  |
| 3                      | Imatinib              | 55.1797                                     | 17.2137                                      | Active                                        |
| 4                      | Nafarelin             | 50.2008                                     | -19.0656                                     | ND                                            |
| 5                      | Nilotinib             | 48.8765                                     | 18.0575                                      | ND                                            |
| 6                      | Antrafenine           | 43.3054                                     | -12.1206                                     | ND                                            |
| 7                      | Vapreotide            | 41.9603                                     | 16.0751                                      | ND                                            |
| 8                      | Gefitinib             | 41.7064                                     | 15.5785                                      | Active                                        |
| <b>9</b>               | <b>Quinine</b>        | <b>40.4845</b>                              | <b>-11.527</b>                               | <b>Clinical Antimalarial</b>                  |
| <b>10</b>              | <b>Quinidine</b>      | <b>40.4845</b>                              | <b>-11.527</b>                               | <b>Clinical Antimalarial</b>                  |
| 11                     | Quinidine barbiturate | 39.6127                                     | -15.6597                                     | Active                                        |
| 12                     | Rilpivirine           | 38.4368                                     | 15.1667                                      | Active                                        |
| 13                     | Thiabendazole         | 37.0463                                     | 15.0677                                      | Active                                        |
| 14                     | Erlotinib             | 34.2159                                     | 14.7457                                      | Inactive <10 $\mu$ M                          |
| 15                     | Gonadorelin           | 33.8182                                     | -18.7343                                     | ND                                            |
| 16                     | Goserelin             | 32.5423                                     | -17.1688                                     | Inactive <10 $\mu$ M                          |
| 17                     | Afatinib              | 30.9591                                     | 11.0776                                      | ND                                            |
| 18                     | Vandetanib            | 30.2873                                     | 2.8095                                       | Active                                        |
| 19                     | Lomitapide            | 29.8482                                     | -15.6564                                     | ND                                            |
| 20                     | Hydroxychloroquine    | 29.579                                      | -7.90028                                     | Active                                        |
| <b>21</b>              | <b>Chloroquine</b>    | <b>28.9237</b>                              | <b>-7.38423</b>                              | <b>Clinical Antimalarial</b>                  |
| <b>22</b>              | <b>Quinacrine</b>     | <b>26.9148</b>                              | <b>0.964427</b>                              | <b>Clinical Antimalarial</b>                  |
| 23                     | Terazosin             | 24.2283                                     | -20.9691                                     | Inactive <10 $\mu$ M                          |
| 24                     | Dasatinib             | 23.8589                                     | 3.44577                                      | Active                                        |
| 25                     | Pazopanib             | 23.8397                                     | 13.2397                                      | Inactive <10 $\mu$ M                          |
| 26                     | Lansoprazole          | 23.4241                                     | -1.71826                                     | Active                                        |
| 27                     | Cetrorelix            | 22.9426                                     | -26.9078                                     | ND                                            |
| 28                     | Sorafenib             | 22.8016                                     | 6.40403                                      | Active                                        |
| 29                     | Regorafenib           | 22.1709                                     | 10.9474                                      | Inactive <10 $\mu$ M                          |
| 30                     | Octreotide            | 21.8772                                     | 0.0651364                                    | ND                                            |
| 31                     | Avanafil              | 21.125                                      | -6.335                                       | ND                                            |
| <b>32</b>              | <b>Halofantrine</b>   | <b>20.8674</b>                              | <b>3.41694</b>                               | <b>Clinical Antimalarial</b>                  |



| <b>Non-βH inhibiting antimalarials</b> |                        |          |          |                       |
|----------------------------------------|------------------------|----------|----------|-----------------------|
| 317                                    | Primaquine             | -2.66276 | -8.36974 | Clinical Antimalarial |
| 469                                    | Doxycycline            | -5.95531 | -5.4519  | Clinical Antimalarial |
| 718                                    | Pyrimethamine          | -10.3092 | -10.695  | Clinical Antimalarial |
| 873                                    | Sulfadoxine            | -13.429  | -3.24919 | Clinical Antimalarial |
| 964                                    | Proguanil              | -15.1309 | -6.73212 | Clinical Antimalarial |
| 1172                                   | Atovaquone             | -19.699  | -10.4775 | Clinical Antimalarial |
| <b>Bottom ranked 2.1%</b>              |                        |          |          |                       |
| 1479                                   | Drotaverine            | -38.3959 | -22.9142 | ND                    |
| 1479                                   | Ethopropazine          | -38.6606 | -27.2162 | ND                    |
| 1480                                   | Cefonicid              | -38.7062 | -13.6207 | ND                    |
| 1481                                   | Niclosamide            | -39.3053 | -22.1728 | Active                |
| 1482                                   | Cisatracurium Besylate | -39.4671 | -30.1177 | Inactive <10 μM       |
| 1483                                   | Ceforanide             | -39.6463 | -8.66601 | ND                    |
| 1484                                   | Nicardipine            | -39.6929 | -31.0469 | Contradicting Data    |
| 1485                                   | Chlorpromazine         | -40.0968 | -30.5136 | Inactive <10 μM       |
| 1486                                   | Furazolidone           | -41.1267 | -25.7797 | Inactive <10 μM       |
| 1487                                   | Acepromazine           | -41.2932 | -26.769  | Inactive <10 μM       |
| 1488                                   | Nilutamide             | -42.0274 | -14.8976 | Inactive <10 μM       |
| 1489                                   | Aceprometazine         | -42.3818 | -32.5787 | ND                    |
| 1490                                   | Diltiazem              | -42.5729 | -17.633  | Inactive <10 μM       |
| 1491                                   | Sildenafil             | -43.0273 | -33.237  | Inactive <10 μM       |
| 1492                                   | Clonazepam             | -43.6032 | -24.5517 | Inactive <10 μM       |
| 1493                                   | Nitrofurantoin         | -43.9518 | -20.7281 | Inactive <10 μM       |
| 1494                                   | Nifedipine             | -44.2094 | -15.5129 | Inactive <10 μM       |
| 1495                                   | Propiomazine           | -44.4947 | -15.9686 | ND                    |
| 1496                                   | Clobazam               | -45.7832 | -20.2821 | Inactive <10 μM       |
| 1497                                   | Nisoldipine            | -46.6286 | -34.8889 | Inactive <10 μM       |
| 1498                                   | Apixaban               | -47.7752 | -12.0871 | Inactive <10 μM       |
| 1499                                   | Probenecid             | -48.0048 | -21.7798 | Inactive <10 μM       |
| 1500                                   | Cefmetazole            | -48.6828 | -26.0458 | Inactive <10 μM       |
| 1501                                   | Entacapone             | -49.5917 | -17.3079 | Inactive <10 μM       |
| 1502                                   | Vardenafil             | -50.4405 | -35.2596 | Inactive <10 μM       |
| 1503                                   | Nitazoxanide           | -52.1584 | -6.27099 | Inactive <10 μM       |
| 1504                                   | Cefazolin              | -52.5087 | -22.5625 | Inactive <10 μM       |
| 1505                                   | Dantrolene             | -56.3814 | -18.768  | Inactive <10 μM       |
| 1506                                   | Nitrendipine           | -56.4016 | -25.1557 | Inactive <10 μM       |
| 1507                                   | Flunitrazepam          | -56.5882 | -14.6742 | ND                    |
| 1508                                   | Nimodipine             | -56.659  | -21.5478 | Inactive <10 μM       |
| 1509                                   | Nilvadipine            | -56.8842 | -26.4166 | Inactive <10 μM       |
| 1510                                   | Acenocoumarol          | -57.1474 | -29.3544 | Inactive <10 μM       |

Table S4: Purchased drug-like compounds

| Predicted inactive against $\beta$ H formation                                                        |                                                                                                        |
|-------------------------------------------------------------------------------------------------------|--------------------------------------------------------------------------------------------------------|
| <p><b>P1</b></p> 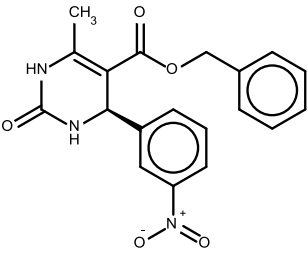    | <p><b>P5</b></p>     |
| <p><b>P2</b></p>    | <p><b>P6</b></p>     |
| <p><b>P3</b></p>   | <p><b>P7</b></p>    |
| <p><b>P4</b></p>   | <p><b>P8</b></p>   |
| <p><b>P9</b></p>  | <p><b>P10</b></p>  |

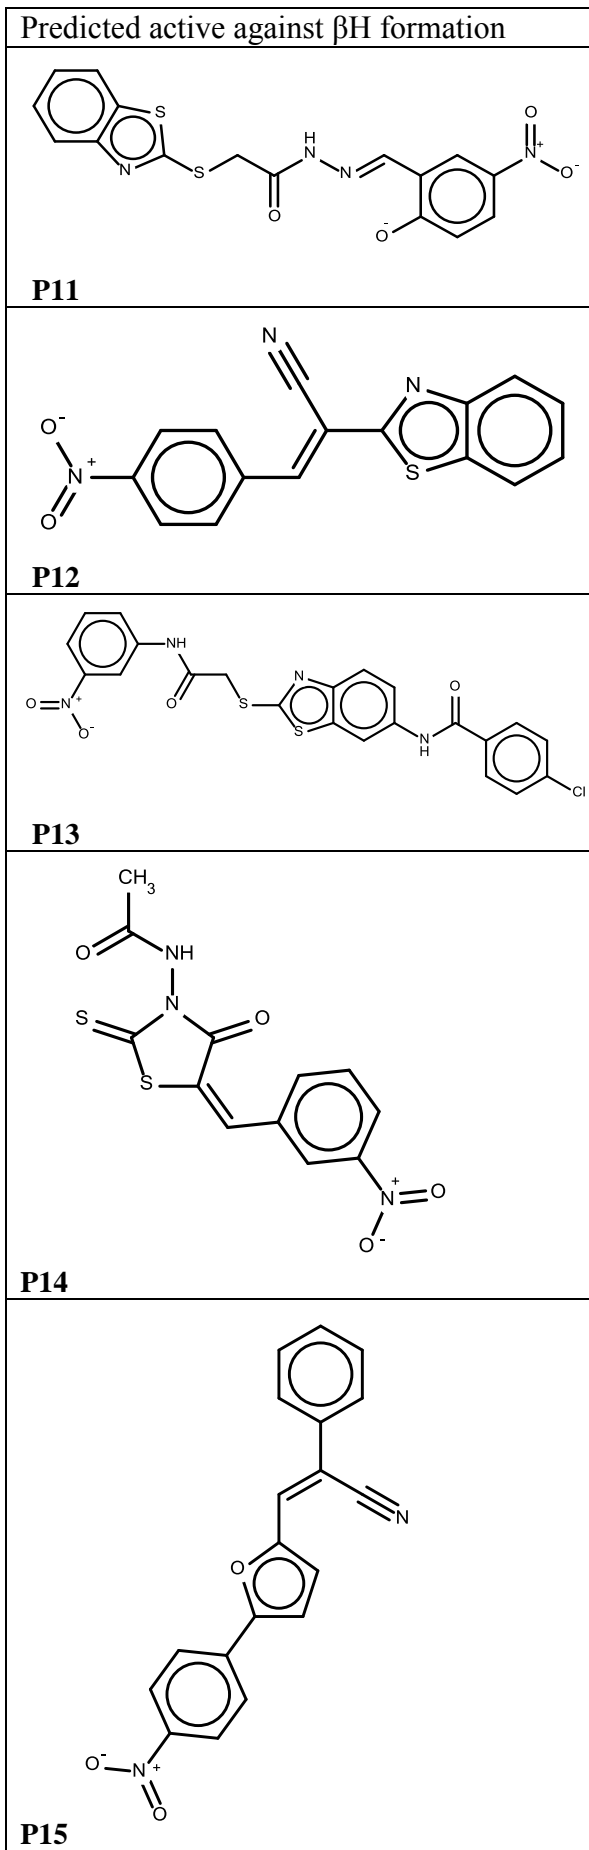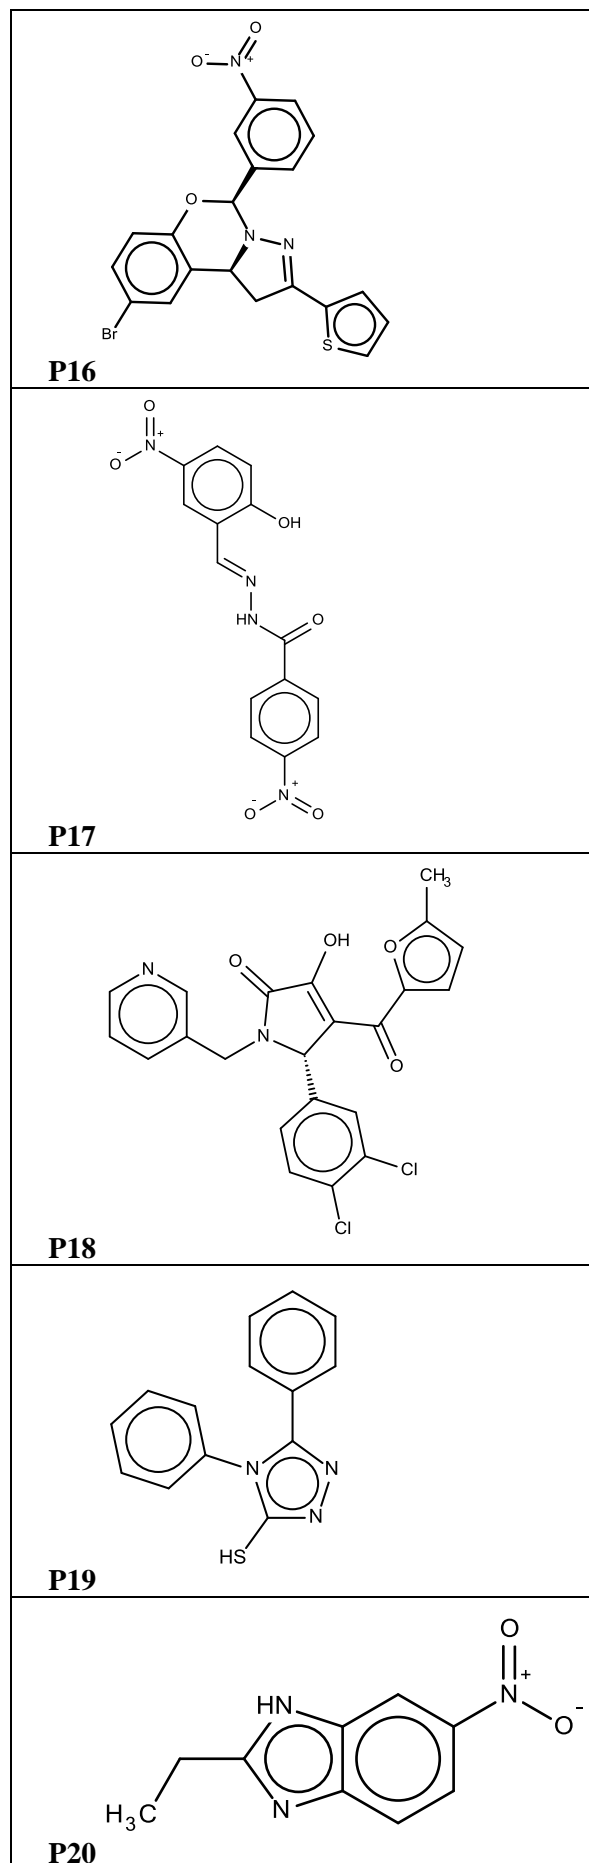

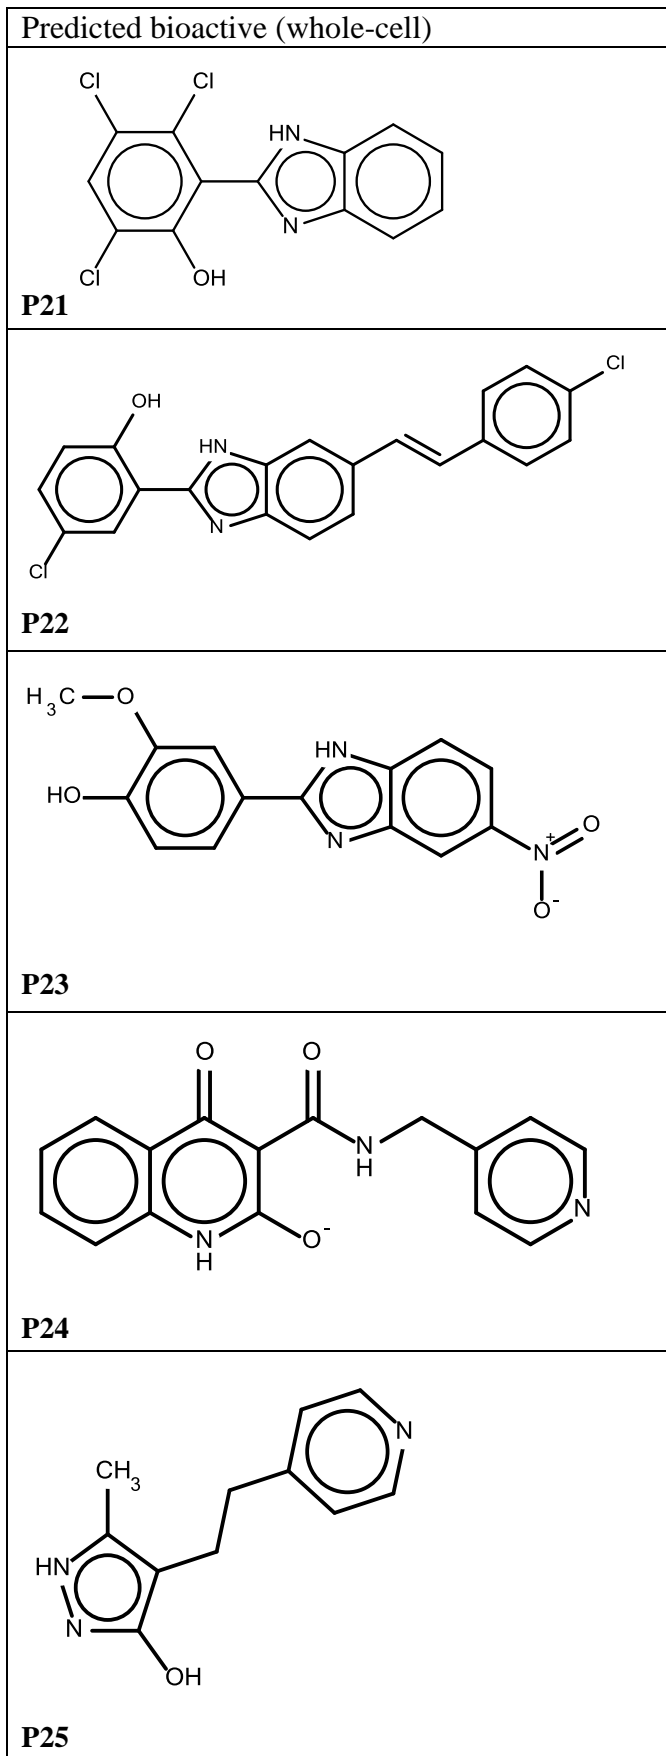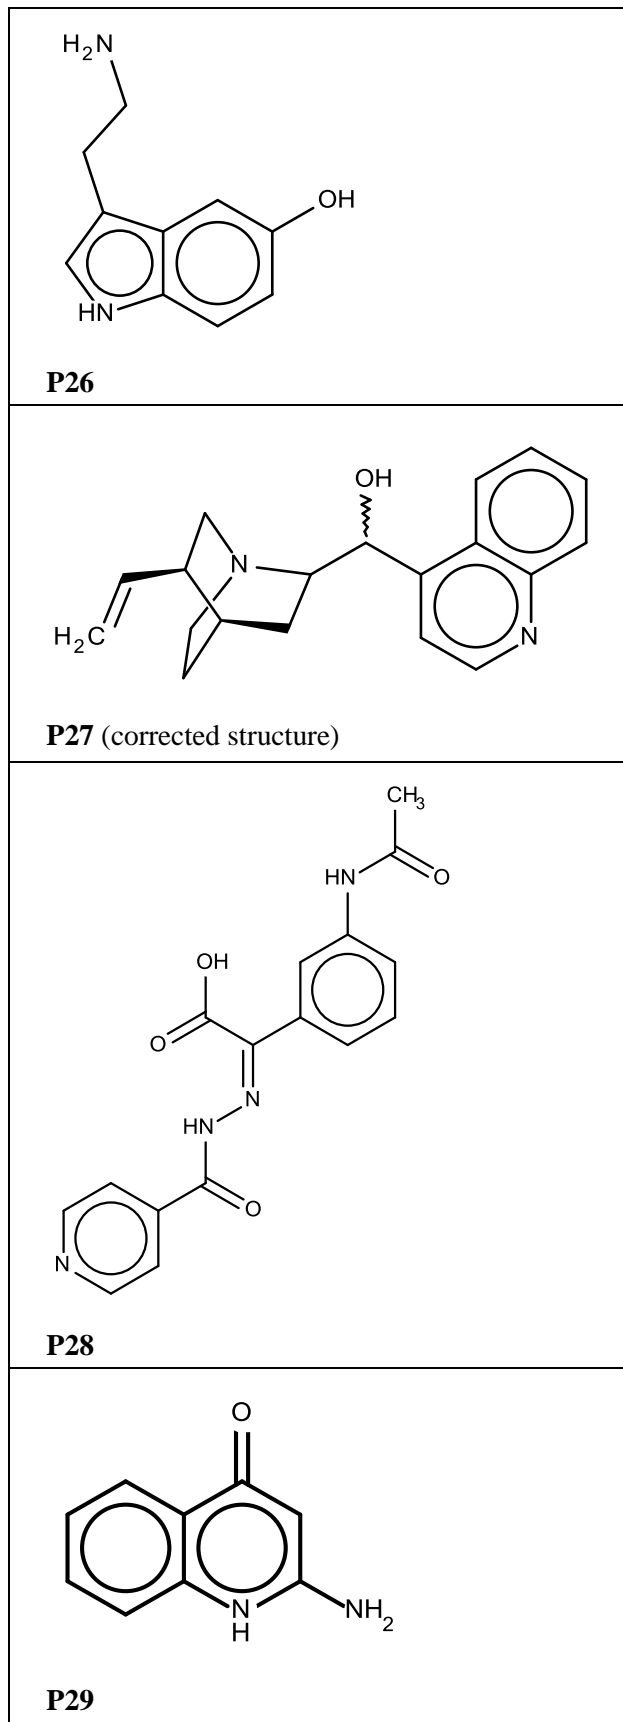

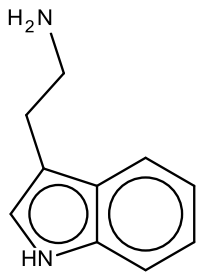**P30**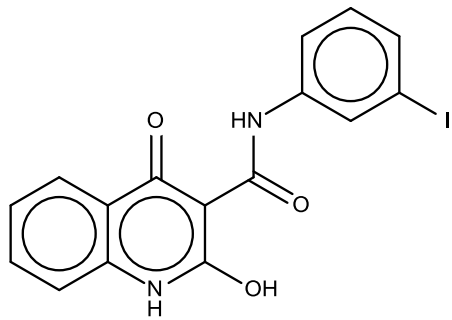**P31**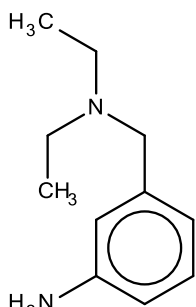**P32**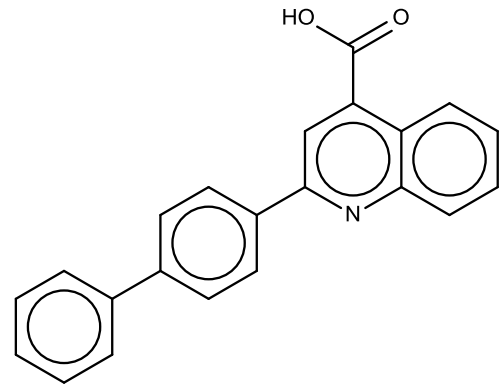**P33**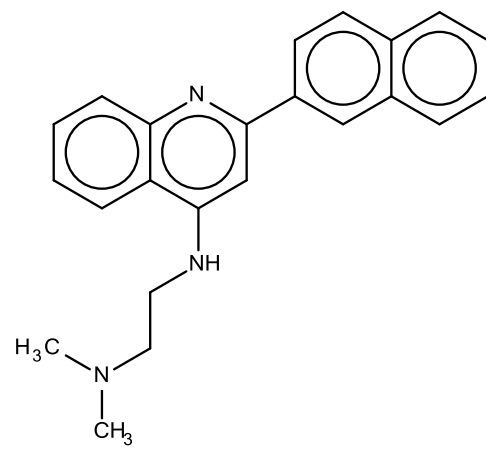**P34**

Figure S4: (a)  $^1\text{H}$  NMR spectrum of **P27**. The protons attached to C19 and C10 overlap in the  $^1\text{H}$  NMR spectrum at 5.7 ppm integrating for 2H. (b)  $^{13}\text{C}$  NMR spectrum of **P27** and (c)  $^1\text{H}$  and  $^{13}\text{C}$  two-dimensional heteronuclear correlation HSQC spectrum. The proton peak at 5.7 ppm couples to carbon C19 at 142 ppm and C10 at 71 ppm. The downfield chemical shift of C10 relative to that expected for an aliphatic carbon nucleus is a result of the electron withdrawing effects of the hydroxyl substituent. NMR spectra were collected using a Bruker Ultrashield 400 Plus spectrometer (at 399.95 MHz for  $^1\text{H}$  and 100.64 MHz for  $^{13}\text{C}$  in deuterated chloroform ( $\text{CDCl}_3$ )). (d) Mass spectrum of **P27** from a JEOL GC mate II single magnetic mass spectrometer (theoretical mass for CD/CN = 294.43 g/mol).

(a)

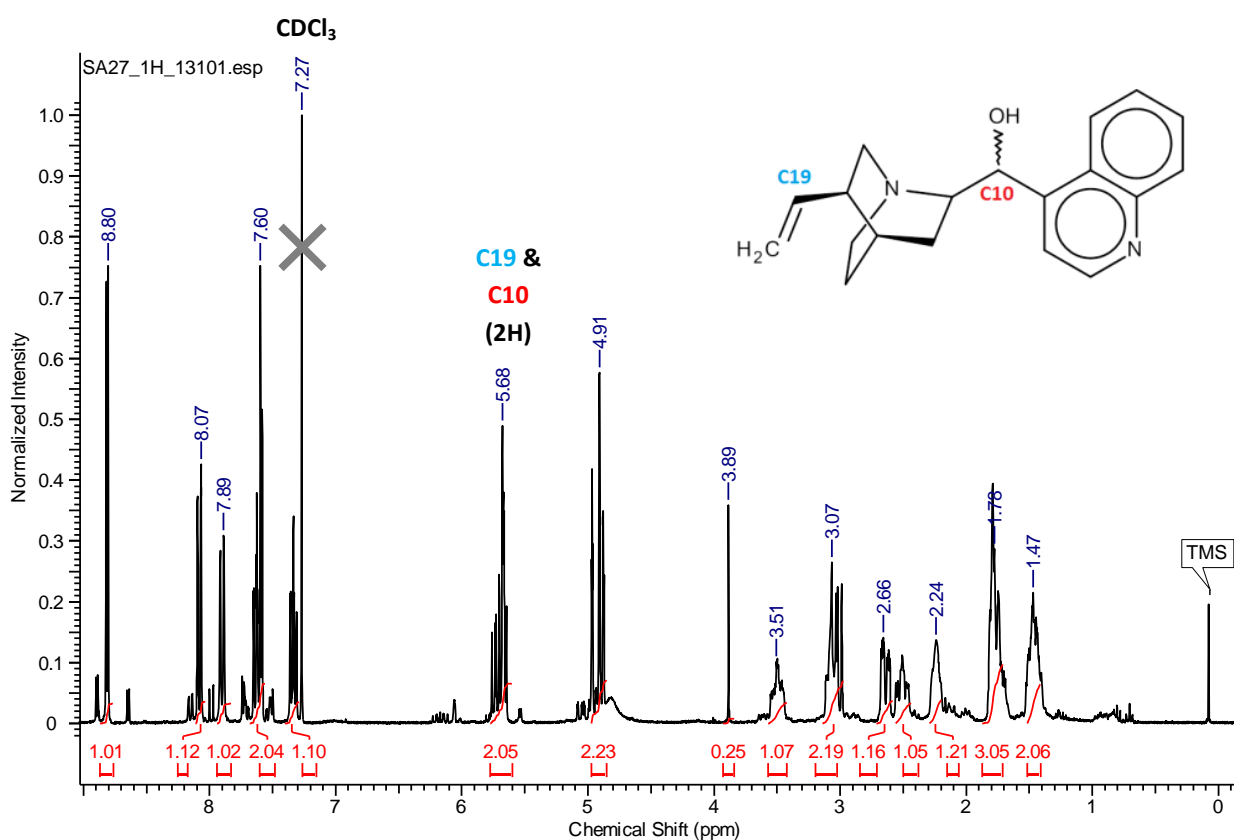

(b)

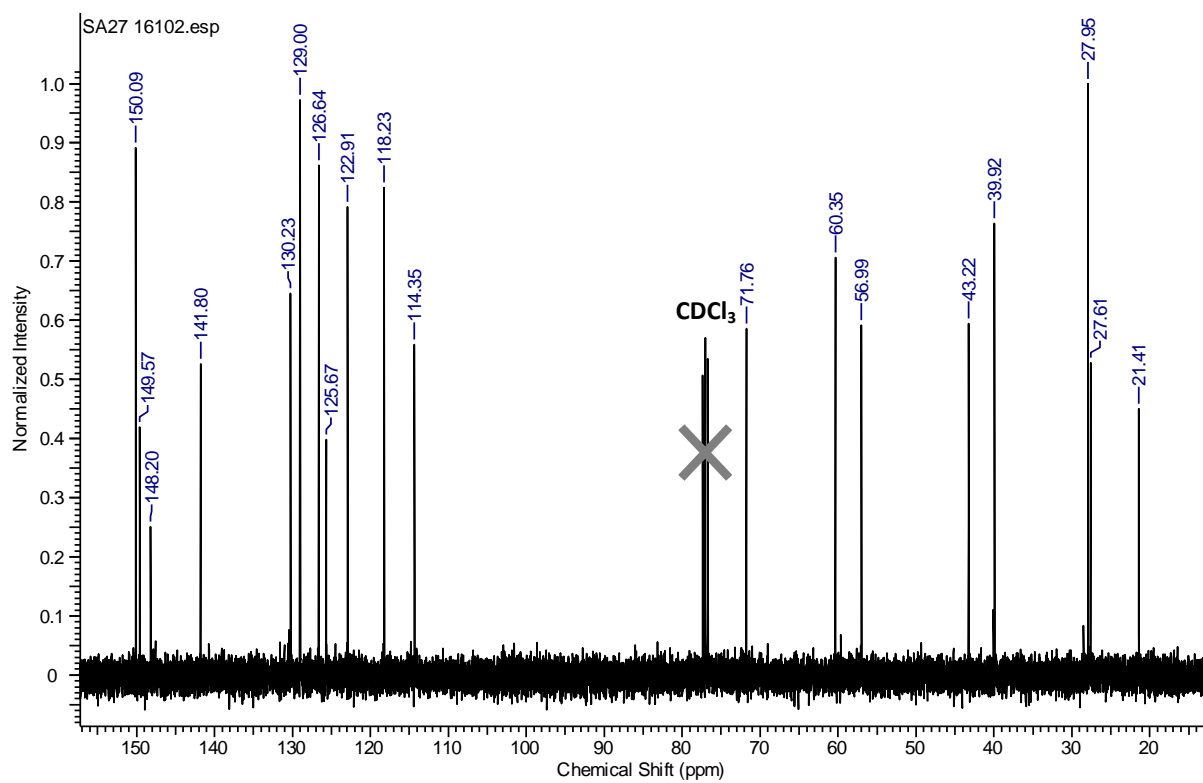

(c)

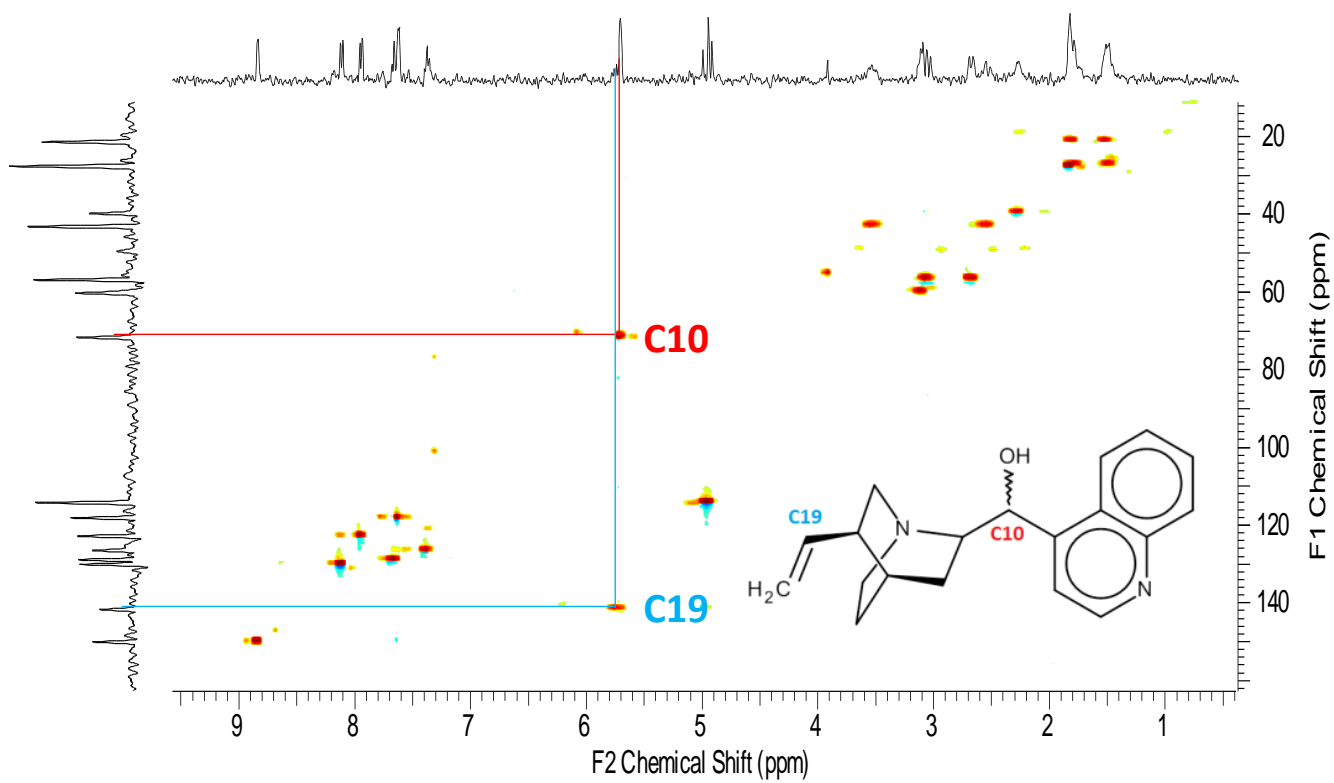

(d)

File: 14J15-SA 27      Date Run: 10-15-2014 (Time Run: 14:27:02)  
Sample:  
Instrument: JEOL GCmateII      Ionization mode: EI+  
Inlet: Direct Probe

Scan: 62  
Base: m/z 136; 41.1% FS    TIC: 5060012

R.T.: 1.23

#Ions: 218

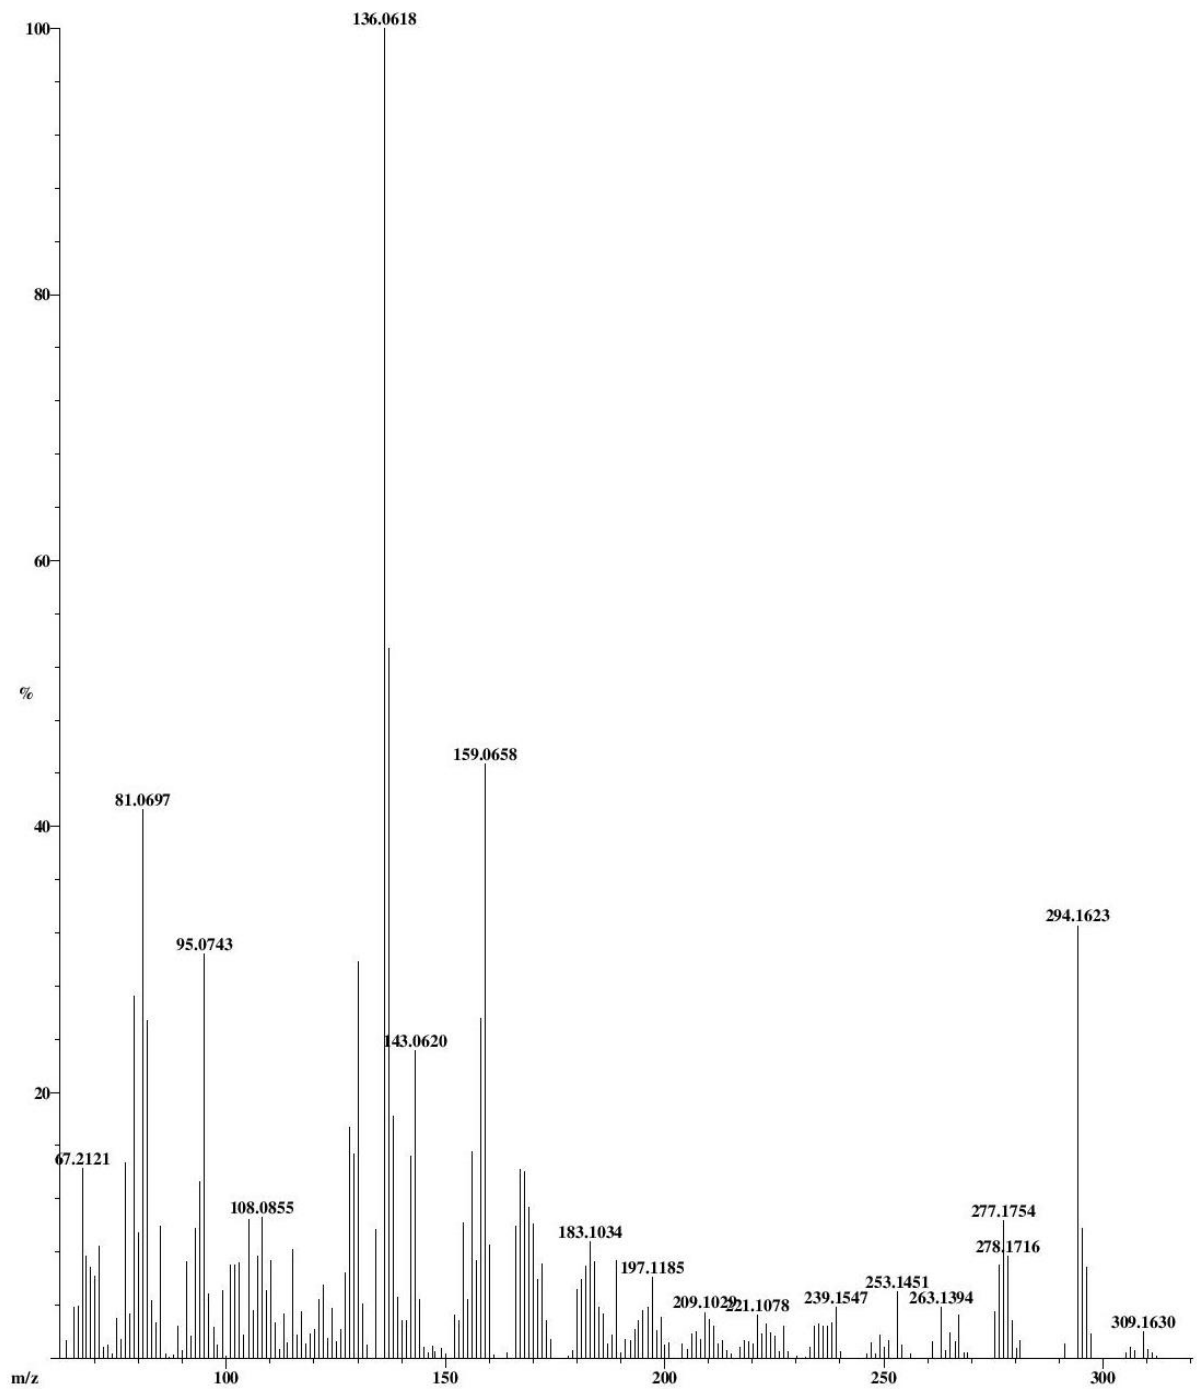

Supplement: NIHMS651246-supplement.pdf [file NIHMS651246-supplement.pdf]
